# Supplementary material
Source: publisher site journal article supplement (https://www.dovepress.com/article/319433)
Supplement: Supplementary file 1 [file get_supplementary_file.php]

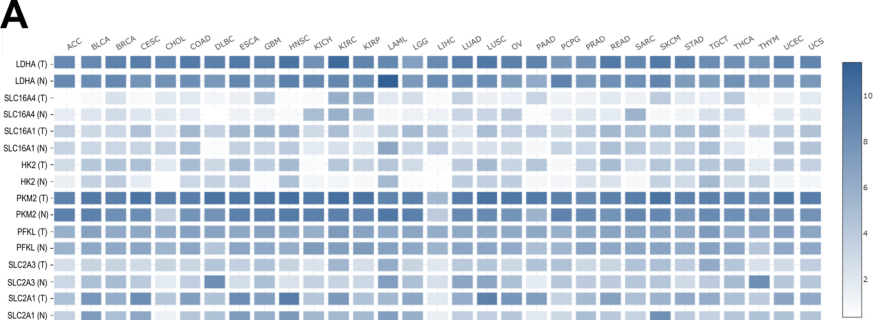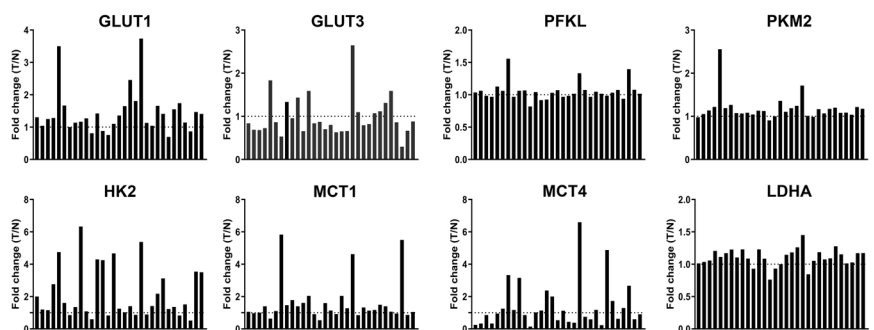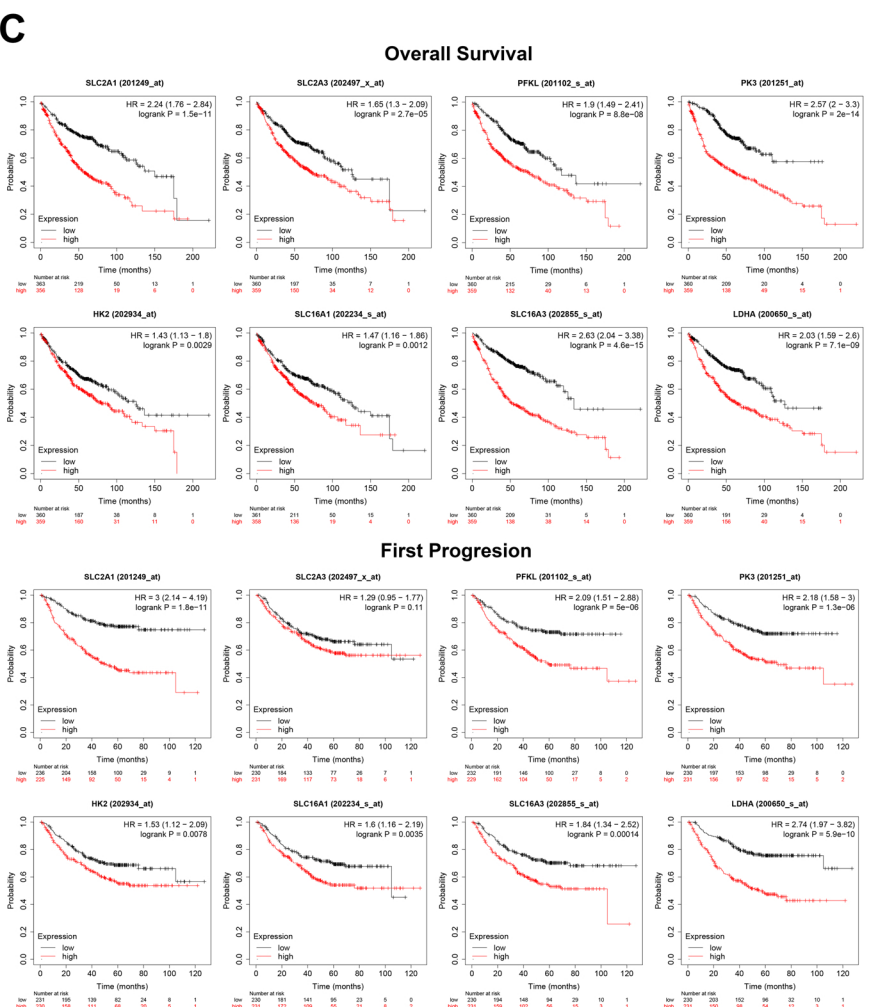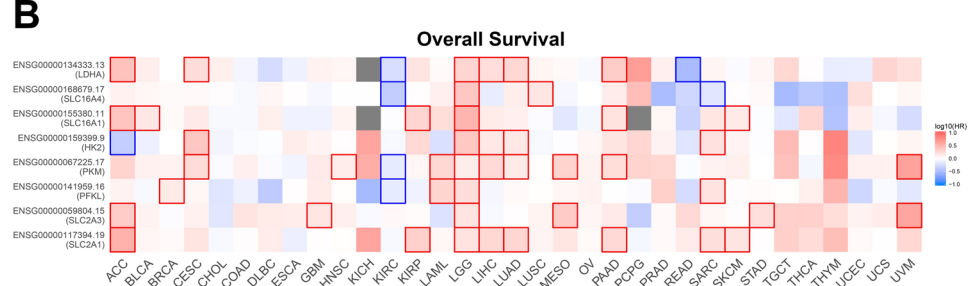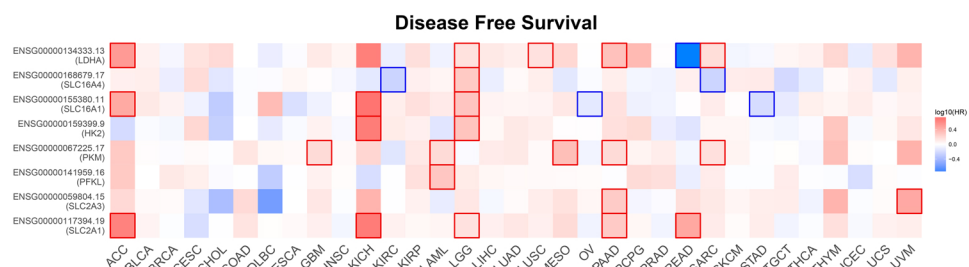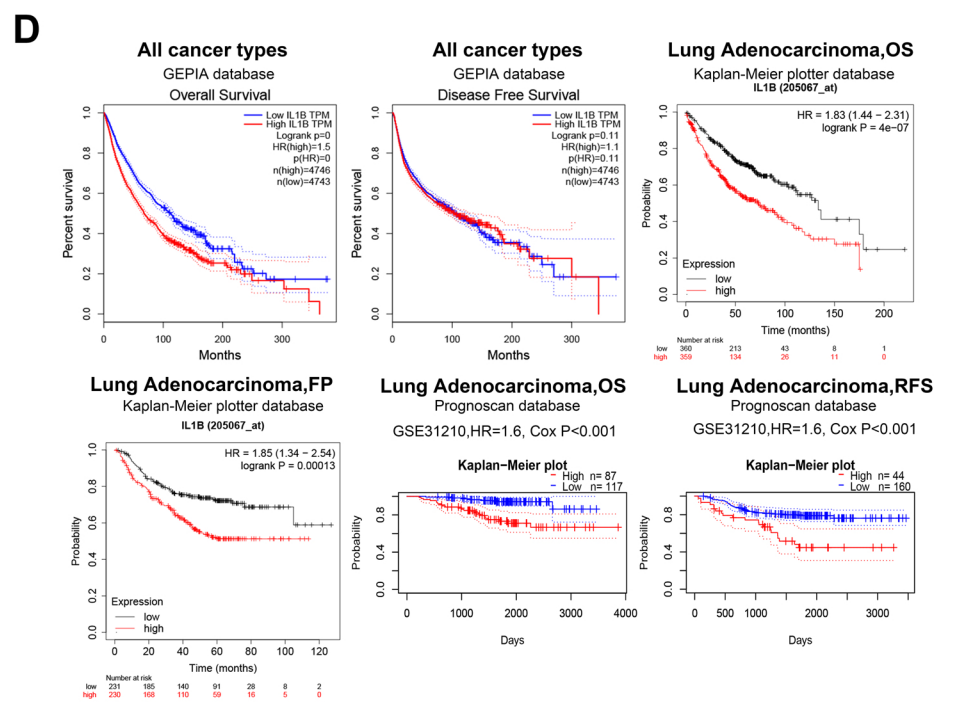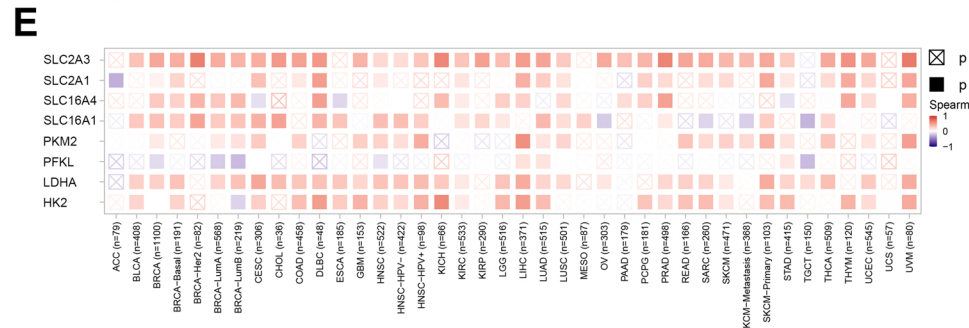

Figure S1. The expression and prognostic value of 7 glycolysis-related genes and IL-1  $\beta$  as well as their relationship in multiple cancer types.

(A) Pan-cancer expression level of glycolysis-related enzyme genes (GEPIA). Upper: Heat map of pan-cancer expression of glycolysis-related enzyme gene;

Below: The ratio of glycolysis-related enzyme gene expression in tumor tissue to normal tissue.

(B) Evaluation of prognostic value of glycolysis-related enzyme genes in pan-cancer (GEPIA). Upper: Overall survival; Below: Disease-free survival.

(C) Prognostic value of glycolysis-related enzyme genes in lung adenocarcinoma (Kaplan-Meier Plotter). Upper: Overall survival; Below: First progression.

(D) Evaluation of the prognostic value of IL-1  $\beta$  with overall survival and disease-free survival through 3 databases. The first two: Prognostic value of IL-1  $\beta$  in all cancer types (GEPIA);

Middle: Prognostic value of IL-1  $\beta$  in lung adenocarcinoma (Kaplan-Meier Plotter); The last two: Prognostic value of IL-1  $\beta$  in lung adenocarcinoma (Prognoscan).

(E) Pan-cancer analysis of the relationship between IL-1  $\beta$  and glycolysis-related enzyme genes (TIMER) using spearman's correlation coefficient. (\*: p-value<0.05).
